# Supplementary material for: Fatty acid metabolites of Dendrobium nobile were positively correlated with representative endophytic fungi at altitude
Source: Front Microbiol. 2023 Apr 27;14:1128956. doi: 10.3389/fmicb.2023.1128956 (PMC10172574; doi:10.3389/fmicb.2023.1128956)
Supplement: Supplementary file 1 [file Table_1.XLSX]

## Sheet: Table S1
Table S1. The detailed information of 30 fatty acid metabolites with significant differences among four altitudes detected by UPLC‒ESI‒MS/MS in D.nobile.
Index	Q1 (Da)	Q3 (Da)	Molecular weight (Da)	Formula	Ionization model	Compounds	Class I	Class II	CAS	Level
pmn001689	311.22	223.17	312.23	C18H32O4	[M-H]-	(Z)-12-hydroxyoctadec-9-enoic acid	Lipids	Free fatty acids	-	1
pmb2804	311.1	171.3	312.23	C18H32O4	[M-H]-	(9Z,11E,13S)-13-hydroperoxyoctadeca-9,11-dienoic acid	Lipids	Free fatty acids	33964-75-9	3
Hmqn003054	329.23	311.22	330.24	C18H34O5	[M-H]-	9,10,11-trihydroxy-12-octadecenoic acid	Lipids	Free fatty acids	61911-67-9	1
pmb2791	309.21	209.1	310.1	C18H30O4	[M-H]-	(10E,15Z)-9-hydroperoxyoctadeca-10,12,15-trienoic acid	Lipids	Free fatty acids	111004-08-1	3
Lmbn004685	311.22	223.17	312.23	C18H32O4	[M-H]-	(5S,8R,9Z,12Z)-5,8-dihydroxyoctadeca-9,12-dienoate	Lipids	Free fatty acids	-	2
Lmbn007891	313.24	183.14	314.25	C18H34O4	[M-H]-	Hydroxy ricinoleic acid	Lipids	Free fatty acids	-	1
pmn001691	327.22	291.2	328.23	C18H32O5	[M-H]-	(9S,10E,12S,13S)-9,12,13-trihydroxyoctadeca-2,10-dienoic acid	Lipids	Free fatty acids	-	1
Hmqp005455	297.24	81.07	296.23	C18H32O3	[M+H] +	(R,9Z)-15-hydroxyoctadeca-2,9-dienoic acid	Lipids	Free fatty acids	177931-23-6	1
pmn001694	329.23	229.15	330.24	C18H34O5	[M-H]-	9,10,13-trihydroxyoctadec-11-enoic acid	Lipids	Free fatty acids	29907-57-1	1
Rfmb091	295.23	195.14	296.24	C18H32O3	[M-H]-	(S,10E,12Z)-9-hydroxyoctadeca-10,12-dienoic acid	Lipids	Free fatty acids	15514-85-9	1
pmb2799	295.23	195.2	296.24	C18H32O3	[M-H]-	11-(3-pentyloxiran-2-yl)undec-9-enoic acid	Lipids	Free fatty acids	6799-85-5	1
Lmbn005662	295.23	171.1	296.24	C18H32O3	[M-H]-	(Z)-8-(3-(oct-2-en-1-yl)oxiran-2-yl)octanoic acid	Lipids	Free fatty acids	16833-56-0	1
Hmqp005411	297.24	81.07	296.23	C18H32O3	[M+H] +	(Z)-9-oxooctadec-12-enoic acid	Lipids	Free fatty acids	112543-32-5	1
Zmyn004676	293.21	113.1	294.22	C18H30O3	[M-H]-	(9Z,12Z,15Z)-17-hydroxyoctadeca-9,12,15-trienoic acid	Lipids	Free fatty acids	-	1
Lmbn005369	295.23	195.14	296.24	C18H32O3	[M-H]-	(S,9Z,11E)-13-hydroxyoctadeca-9,11-dienoic acid	Lipids	Free fatty acids	10219-69-9	1
Lmbn004240	329.23	199.13	330.24	C18H34O5	[M-H]-	9,10-dihydroxy-11-(3-pentyloxiran-2-yl)undecanoic acid	Lipids	Free fatty acids	-	1
Lmbn005443	293.21	235.17	294.22	C18H30O3	[M-H]-	(9Z,11E)-13-oxooctadeca-9,11-dienoic acid	Lipids	Free fatty acids	54739-30-9	3
MWSmce692	277.22	59.01	278.22	C18H30O2	[M-H]-	(6Z,9Z,12Z)-octadeca-6,9,12-trienoic acid	Lipids	Free fatty acids	506-26-3	1
Lmbn005923	277.22	59.01	278.22	C18H30O2	[M-H]-	Octadec-9-en-12-ynoic acid	Lipids	Free fatty acids	2277-31-8	1
Zmjn004133	311.22	293.21	312.23	C18H32O4	[M-H]-	(S,10E,12Z)-9-hydroperoxyoctadeca-10,12-dienoic acid	Lipids	Free fatty acids	5502-91-0	3
pmb0889	279.23	95.1	278.22	C18H30O2	[M+H] +	(9Z,11E,13Z)-octadeca-9,11,13-trienoic acid	Lipids	Free fatty acids	544-72-9	3
Zmyn004548	291.2	235.17	292.2	C18H28O3	[M-H]-	3,7,11,15-tetramethyl-12-oxohexadeca-2,4-dienoic acid	Lipids	Free fatty acids	85551-10-6	2
pmb2786	293.21	235.17	294.22	C18H30O3	[M-H]-	9-hydroxy-10,12,15-octadecatrienoic acid	Lipids	Free fatty acids	89886-42-0	3
Lmbn005487	313.24	251.24	314.25	C18H34O4	[M-H]-	Octadec-9-enoic acid	Lipids	Free fatty acids	263399-35-5	1
Zmzn003953	309.2	227.2	310.21	C18H30O4	[M-H]-	(S,9Z,11E,15Z)-13-hydroperoxyoctadeca-9,11,15-trienoic acid	Lipids	Free fatty acids	67597-26-6	1
pmb1574	277.2	93	276.21	C18H28O2	[M+H] +	Octadeca-9,12-dien-6-ynoic acid	Lipids	Free fatty acids	61481-29-6	3
mws0371	327.23	283.3	328.24	C22H32O2	[M-H]-	(4Z)-docosa-4,7,10,13,16,19-hexaenoic acid	Lipids	Free fatty acids	6217-54-5	3
Zmyn005384	299.26	253.26	300.27	C18H36O3	[M-H]-	(R)-2-hydroxyoctadecanoic acid	Lipids	Free fatty acids	26633-48-7	2
MWS4295	299.26	253.25	300.27	C18H36O3	[M-H]-	2-hydroxyoctadecanoic acid	Lipids	Free fatty acids	629-22-1	2
pmf0400	339.33	183.2	340.33	C22H44O2	[M-H]-	Docosanoic acid	Lipids	Free fatty acids	112-85-6	3
